# Supplementary material for: Establishment of the mid-sagittal reference plane for three-dimensional assessment of facial asymmetry: a systematic review
Source: Springer Nature journal article supplement (doi:10.1007/s00784-024-05620-7), 2024-04-05
Supplement: MOESM3 [file 26948064]

Supplementary Figure. Tabular representation for QUADAS-2 results

| Study                       | RISK OF BIAS            |      |            |      |         |                    |         |           |         |         | APPLICABILITY CONCERNS   |            |      |                    |
|-----------------------------|-------------------------|------|------------|------|---------|--------------------|---------|-----------|---------|---------|--------------------------|------------|------|--------------------|
|                             | Subject/model selection |      | Index test |      |         | Reference standard |         | Work flow |         |         | Subject/ model selection | Index test |      | Reference standard |
|                             | Q1                      | Q2   | Q1         | Q2   | Q1      | Q1                 | Q2      | Q1        | Q2      | Q3      | Q1                       | Q1         | Q2   | Q1                 |
| Wong et al. (2005)          | High                    | High | High       | High | Unclear | Low                | Low     | Low       | Unclear | Unclear | High                     | Low        | High | Low                |
| Hartmann et al. (2007)      | High                    | High | High       | Low  | Low     | Low                | Low     | Low       | Low     | High    | High                     | Low        | Low  | Low                |
| AlHadidi et al. (2011)      | Unclear                 | High | Low        | Low  | Low     | Low                | Low     | Low       | Low     | Low     | Unclear                  | Low        | Low  | Low                |
| Kim et al. (2011)           | Low                     | High | High       | Low  | Low     | Low                | Low     | Low       | Low     | High    | Unclear                  | Low        | Low  | Low                |
| Baek et al. (2012)          | Low                     | High | Low        | Low  | Low     | Low                | Low     | Low       | Low     | Low     | Unclear                  | Unclear    | Low  | Low                |
| Damstra et al. (2012)       | Unclear                 | High | Low        | Low  | Low     | Low                | Low     | Low       | Low     | High    | Unclear                  | Low        | Low  | Low                |
| Berssenbrügge et al. (2014) | High                    | High | Low        | High | Low     | Low                | Low     | Low       | Unclear | Unclear | High                     | Low        | High | Low                |
| Wong et al. (2014)          | Low                     | High | Low        | High | Low     | Low                | Low     | Low       | Unclear | High    | Low                      | Low        | High | Low                |
| Gateno et al. (2015)        | High                    | High | High       | Low  | High    | Unclear            | High    | High      | High    | High    | High                     | High       | High | Unclear            |
| Kim et al. (2015)           | Unclear                 | High | Low        | Low  | Low     | Low                | Low     | Low       | Unclear | Unclear | Unclear                  | Low        | High | Low                |
| Ryu et al. (2015)           | Low                     | High | Low        | Low  | Low     | Low                | Low     | Low       | Low     | Unclear | Low                      | Low        | Low  | Low                |
| Lee et al. (2016)           | Unclear                 | High | Low        | Low  | Low     | Unclear            | Low     | Low       | Unclear | Unclear | Unclear                  | Low        | High | Unclear            |
| Shin et al. (2016)          | Low                     | High | Low        | Low  | Low     | Low                | Low     | Low       | Low     | High    | Unclear                  | Low        | Low  | Low                |
| Song et al. (2016)          | Low                     | High | Low        | Low  | Low     | Low                | Low     | Low       | Low     | High    | Low                      | Unclear    | Low  | Low                |
| SangIn An et al. (2017)     | High                    | High | Low        | Low  | Low     | Low                | Low     | Low       | Low     | Unclear | High                     | Low        | Low  | Low                |
| Dobai et al. (2018)         | High                    | High | High       | Low  | Unclear | Unclear            | Low     | Low       | Low     | High    | High                     | Low        | Low  | Unclear            |
| Economou et al. (2018)      | Unclear                 | High | Low        | Low  | Low     | Low                | Low     | Low       | Low     | High    | High                     | Low        | Low  | Low                |
| Jajoo et al. (2018)         | Low                     | High | High       | Low  | Unclear | Low                | Low     | Low       | Unclear | High    | Unclear                  | Low        | High | Low                |
| Oh et al. (2018)            | Low                     | High | Low        | Low  | Low     | Low                | Low     | Low       | Low     | Unclear | Low                      | Low        | Low  | Low                |
| Thiesen et al. (2018)       | Low                     | High | Low        | Low  | Low     | Low                | Low     | Low       | Low     | High    | Low                      | Low        | Low  | Low                |
| Udomlarptham et al. (2018)  | Low                     | High | Low        | Low  | Low     | Low                | Low     | Low       | Low     | Unclear | Low                      | Low        | Low  | Low                |
| Wong et al. (2018)          | Unclear                 | High | Low        | High | Low     | Low                | Unclear | Low       | Low     | High    | Unclear                  | Low        | Low  | Low                |
| Zhang et al. (2018)         | Unclear                 | High | Low        | Low  | Low     | Low                | Low     | Low       | Low     | Unclear | Unclear                  | Low        | Low  | Low                |
| Zheng et al. (2018)         | Unclear                 | High | Low        | Low  | Low     | Unclear            | Low     | Low       | Low     | High    | Unclear                  | Low        | Low  | Unclear            |
